# Supplementary material for: Potentially Toxic Elements (PTEs) in Soils and Bulbs of Elephant Garlic (Allium ampeloprasum L.) Grown in Valdichiana, a Traditional Cultivation Area of Tuscany, Italy
Source: MDPI journal article supplement (doi:10.3390/app11157023), 2021-07-29
Supplement: s1 [file s1]

**Table S1.** Limit of Detection (LOD; mg/kg) of PTEs analyzed by ICP-MS and range of PTE concentrations (mg/kg) and recoveries (%) in the standard reference materials GBW 07604 (*Poplar Leaves*) and SRM 2709 (*San Joaquin Soil*).

| Elements | LOD             | LOD   | GBW 07604      |             | SRM 2709       |            |
|----------|-----------------|-------|----------------|-------------|----------------|------------|
|          | elephant garlic | soil  | concentrations | recoveries  | concentrations | recoveries |
| As       | 0.001           | 0.04  | 0.35-0.37      | 93.8-98.9   | 16.6-17.6      | 93.6-99.6  |
| Cd       | 0.001           | 0.01  | 0.34-0.37      | 106.2-114   | 0.38-0.39      | 99.2-102.9 |
| Co       | 0.01            | 0.01  | 0.43-0.45      | 103.3-107.6 | 12.8-13.4      | 95.4-99.8  |
| Cr       | 0.02            | 0.08  | 0.50-0.55      | 91-99.6     | 121-135        | 93.1-103.7 |
| Cu       | 0.04            | 0.09  | 9.38-9.66      | 100.9-103.9 | 34.2-36.5      | 98.9-105.5 |
| Ni       | 0.02            | 0.08  | 1.97-2.09      | 103.5-110   | 79.6-86.2      | 90.4-97.9  |
| Pb       | 0.01            | 0.02  | 1.55-1.69      | 103.1-112.9 | 17.4-18.9      | 92.2-99.8  |
| Sb       | 0.001           | 0.002 | 0.041-0.043    | 91.1-95.5   | 7.20-8.02      | 91.1-101.5 |
| Tl       | 0.001           | 0.01  | 0.004-0.007    | --          | 0.68-0.71      | 92.2-95.9  |
| U        | 0.001           | 0.004 | 0.026-0.031    | 92.8-110.7  | 2.72-2.95      | 90.7-98.3  |
| V        | 0.04            | 0.02  | 0.60-0.66      | 94.2-102.3  | 105-106        | 93.7-94.5  |
| Zn       | 0.4             | 0.5   | 37.6-38.8      | 101.6-104.9 | 97.0-108       | 91.5-101.6 |
